# Supplementary material for: Multitask deep learning with dynamic task balancing for quantum mechanical properties prediction
Source: Royal Society of Chemistry journal article supplement (doi:10.1039/d1cp05172e), 2022-01-01
Supplement: d1cp05172e1.pdf [file d1cp05172e1.pdf]

# **Electronic Supplementary Information for Multitask Deep Learning with Dynamic Task Balancing for Quantum Mechanical Properties Prediction**

*Ziduo Yang<sup>a#</sup>, Weihe Zhong<sup>a#</sup>, Qiuji Lv<sup>a</sup>, Calvin Yu-Chian Chen<sup>a,b,c\*</sup>*

*<sup>a</sup>Artificial Intelligence Medical Center, School of Intelligent Systems Engineering, Sun Yat-sen University, Shenzhen, 510275, China*

*<sup>b</sup>Department of Medical Research, China Medical University Hospital, Taichung 40447, Taiwan*

*<sup>c</sup>Department of Bioinformatics and Medical Engineering, Asia University, Taichung, 41354, Taiwan*

*<sup>#</sup> Equal contribution*

*\* Corresponding Authors*

**Calvin Yu-Chian Chen, Ph.D.**

Dean of Artificial Intelligence Medical Center, Professor of School of Intelligent Systems Engineering, Sun Yat-sen University.

TEL: 02039332153

E-mail: chenychian@mail.sysu.edu.cn

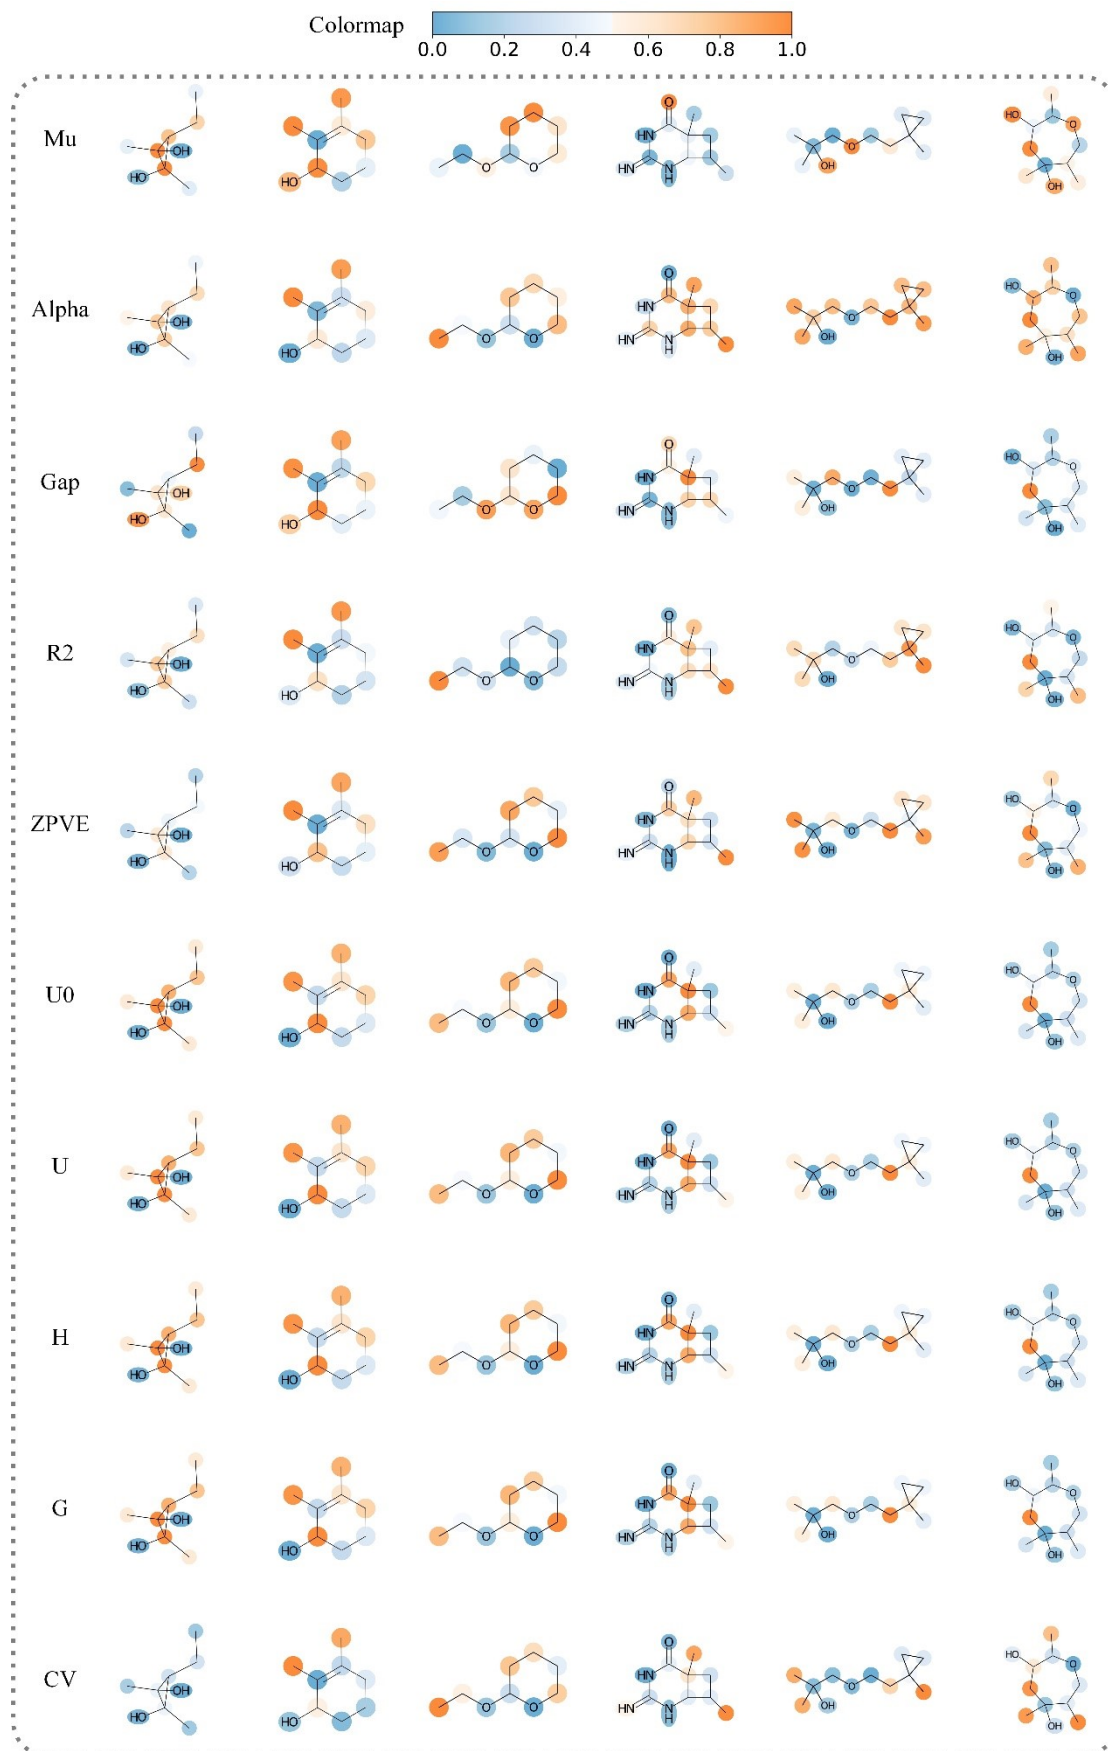

Figure S1. Visual interpretation for ten quantum mechanical properties.
